# Supplementary material for: Multi-Omics Profiling Identifies Candidate Genes Controlling Seed Size in Peanut
Source: MDPI journal article supplement (doi:10.3390/plants11233276), 2022-11-28
Supplement: s1 [file s1]

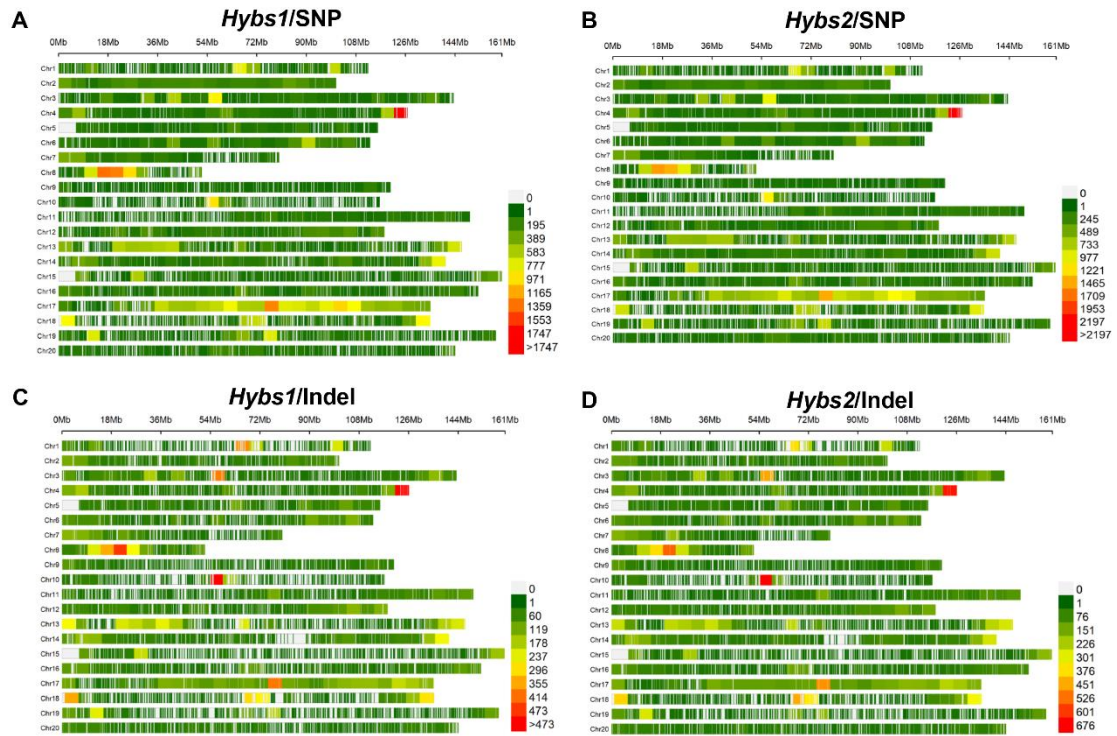

**Figure S1. Manhattan plot for  $^{60}\text{Co}$ -induced SNPs/indels.**

(A) Manhattan plot for  $^{60}\text{Co}$ -induced SNPs in *hybs1*.

(B) Manhattan plot for  $^{60}\text{Co}$ -induced indels in *hybs1*.

(C) Manhattan plot for  $^{60}\text{Co}$ -induced SNPs in *hybs2*.

(D) Manhattan plot for  $^{60}\text{Co}$ -induced indels in *hybs2*.

The x axis showed the chromosomal position. Chr 1-10 indicated the A subgenome and chr 11-20 indicated the B subgenome.

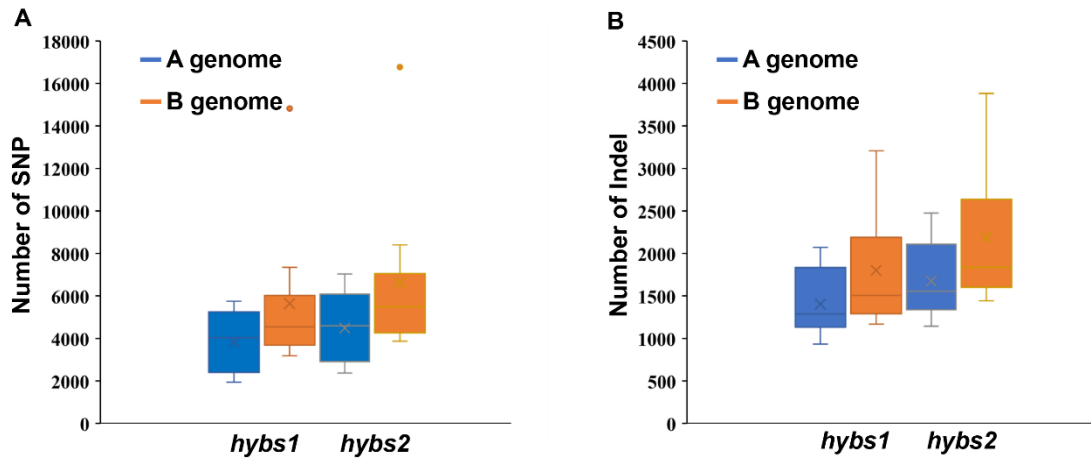

**Figure S2. The number of  $^{60}\text{Co}$ -induced SNPs/indels in *hybs1* and *hybs2*.**

(A) Box-plots show the number of  $^{60}\text{Co}$ -induced SNPs in different chromosome of *hybs1* and *hybs2*.

(B) Box-plots show the number of  $^{60}\text{Co}$ -induced indels in different chromosome of *hybs1* and *hybs2*.

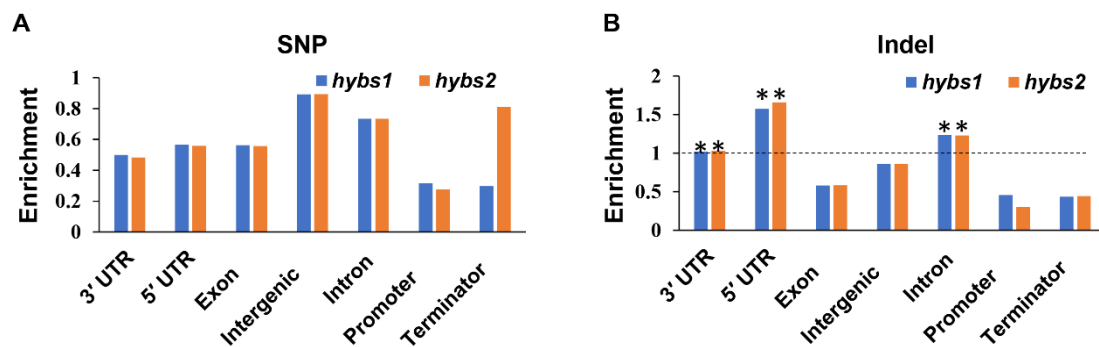

**Figure S3. Relative enrichment of SNPs/Indels in different genomic elements.**

(A) Relative enrichment of SNPs in different genomic elements.

(B) Relative enrichment of indels in different genomic elements.

The dashed line represents enrichment fold = 1.0. Permutation test; asterisks denote the observed value was >90% of the permutation value.

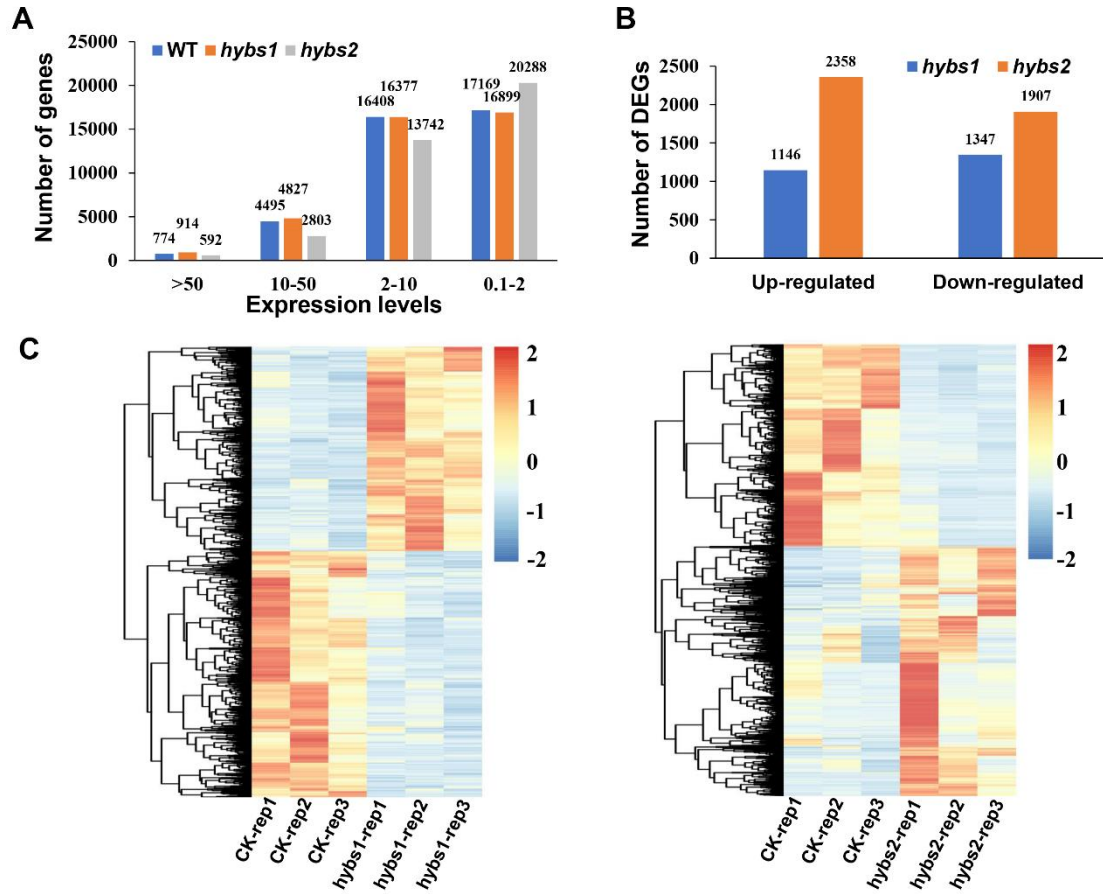

**Figure S4. RNA-Seq analyses of *hybs1* and *hybs2*.**

- (A) The number of genes with different expression levels in WT, *hybs1*, and *hybs2*.
- (B) The number of up-regulated and down-regulated genes in *hybs1* and *hybs2* as compared with WT.
- (C) Heatmap showing the relative expression of genes in WT, *hybs1* and *hybs2*.

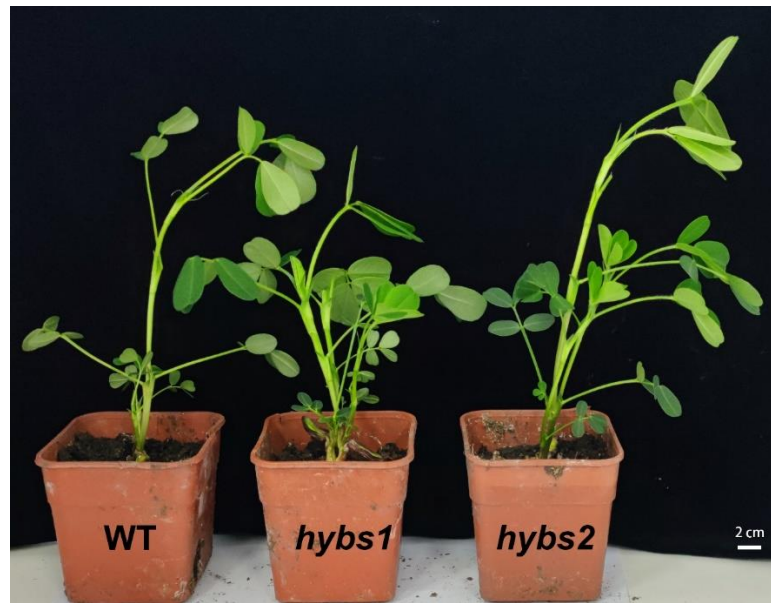

**Figure S5. Plant height of WT, *hybs1*, and *hybs2*.**

The phenotype of WT, *hybs1*, and *hybs2* in 10-d-old plants grown in a greenhouse under a 15-h light (26°C)/9-h dark (25°C) photoperiod. Scale bars are 2 cm.
